# Supplementary material for: Quality improvements of healthcare trajectories by learning from aggregated patient-reported outcomes: a mixed-methods systematic literature review
Source: PubMed Central journal article supplement (PMC9387033; doi:10.1186/s12961-022-00893-4), 2022-08-17
Supplement: 12961_2022_893_MOESM2_ESM.pdf [file 12961_2022_893_MOESM2_ESM.pdf]

|                               |                                                                                                | Boyce, 2015 <sup>28</sup> | Weingarten, 2000 <sup>24</sup> | Kumar, 2021 <sup>36</sup> | Varaganam, 2014 <sup>34</sup> | Bronserud, 2019 <sup>29</sup> | Van zijl, 2021 <sup>25</sup> | Lucas, 2017 <sup>27</sup> | Gutacker, 2013 <sup>30</sup> | van Veghel, 2016 <sup>33</sup> | Lundstrom, 2013 <sup>31</sup> | Zheng, 2014 <sup>35</sup> | Partridge, 2016 <sup>32</sup> | Boyce, 2018 <sup>37</sup> | van der Wees, 2014 <sup>11</sup> | Prodinge, 2018 <sup>10</sup> |
|-------------------------------|------------------------------------------------------------------------------------------------|---------------------------|--------------------------------|---------------------------|-------------------------------|-------------------------------|------------------------------|---------------------------|------------------------------|--------------------------------|-------------------------------|---------------------------|-------------------------------|---------------------------|----------------------------------|------------------------------|
| <b>Randomized studies</b>     | Is randomization appropriately performed?                                                      | Yes                       | Yes                            |                           |                               |                               |                              |                           |                              |                                |                               |                           |                               |                           |                                  |                              |
|                               | Are the groups comparable at baseline?                                                         | Yes                       | Yes                            |                           |                               |                               |                              |                           |                              |                                |                               |                           |                               |                           |                                  |                              |
|                               | Are there complete outcome data?                                                               | Yes                       | No                             |                           |                               |                               |                              |                           |                              |                                |                               |                           |                               |                           |                                  |                              |
|                               | Are outcome assessors blinded to the intervention provided?                                    | No                        | No                             |                           |                               |                               |                              |                           |                              |                                |                               |                           |                               |                           |                                  |                              |
|                               | Did the participants adhere to the assigned intervention?                                      | Yes                       | Yes                            |                           |                               |                               |                              |                           |                              |                                |                               |                           |                               |                           |                                  |                              |
| <b>Non-randomized studies</b> | Are the participants representative of the target population?                                  |                           |                                | Yes                       | Yes                           | Yes                           | Yes                          | Yes                       | Yes                          | Yes                            | Yes                           | Yes                       |                               |                           |                                  |                              |
|                               | Are measurements appropriate regarding both the outcome and intervention (or exposure)?        |                           |                                | Yes                       | Yes                           | Yes                           | yes                          | Yes                       | Yes                          | Yes                            | Yes                           | Yes                       |                               |                           |                                  |                              |
|                               | Are there complete outcome data?                                                               |                           |                                | Yes                       | Can't tell                    | No                            | Yes                          | yes                       | Can't tell                   | No                             |                               |                           |                               |                           |                                  |                              |
|                               | Are the confounders accounted for in the design and analysis?                                  |                           |                                | Yes                       | Yes                           | Yes                           | Can't tell                   | No                        | Yes                          | Can't tell                     |                               |                           |                               |                           |                                  |                              |
|                               | During the study periode, is the intervention administered (or exposure occurred) as intended? |                           |                                | Yes                       | Yes                           | Yes                           | Yes                          | Yes                       | Yes                          | Yes                            |                               |                           |                               |                           |                                  |                              |
| <b>Descriptive studies</b>    | Is the sampling strategy relevant to address the research question?                            |                           |                                |                           |                               |                               |                              |                           |                              |                                | Yes                           | Yes                       | Yes                           |                           |                                  |                              |
|                               | Is the sample representative of the target population?                                         |                           |                                |                           |                               |                               |                              |                           |                              |                                | Yes                           | Yes                       | Yes                           |                           |                                  |                              |
|                               | Are the measurements appropriate?                                                              |                           |                                |                           |                               |                               |                              |                           |                              |                                | Yes                           | Yes                       | Yes                           |                           |                                  |                              |
|                               | Is the risk of nonresponse bias low?                                                           |                           |                                |                           |                               |                               |                              |                           |                              |                                | Can't tell                    | Can't tell                | Yes                           |                           |                                  |                              |
|                               | Is the statistical analysis appropriate to answer the research question?                       |                           |                                |                           |                               |                               |                              |                           |                              |                                | Yes                           | Can't tell                | Yes                           |                           |                                  |                              |
| <b>Qualitative</b>            | Is the qualitative approach appropriate to answer the research question?                       |                           |                                |                           |                               |                               |                              |                           |                              |                                |                               |                           |                               | Yes                       | Yes                              | Yes                          |
|                               | Are the qualitative data collection methods adequate to address the research question?         |                           |                                |                           |                               |                               |                              |                           |                              |                                |                               |                           |                               | Yes                       | Yes                              | Yes                          |
|                               | Are the findings adequately derived from the data?                                             |                           |                                |                           |                               |                               |                              |                           |                              |                                |                               |                           |                               | Yes                       | Yes                              | Yes                          |
|                               | Is the interpretation of results sufficiently substantiated by data?                           |                           |                                |                           |                               |                               |                              |                           |                              |                                |                               |                           |                               | Yes                       | Yes                              | Yes                          |
|                               | Is there coherence between qualitative data sources, collection, analysis and interpretation?  |                           |                                |                           |                               |                               |                              |                           |                              |                                |                               |                           |                               | Yes                       | Yes                              | Yes                          |
